# Supplementary material for: Gamma-FIT-PNAs as sensitive RNA probes
Source: Royal Society of Chemistry journal article supplement (doi:10.1039/d5cb00292c), 2026-01-01
Supplement: d5cb00292c1.pdf [file d5cb00292c1.pdf]

S

## **Supplementary Information**

### **Gamma-FIT-PNAs as Sensitive RNA Probes**

Manoj Kumar Gupta<sup>1</sup>, Salam Maree<sup>1</sup>, and Eylon Yavin<sup>1,\*</sup>

<sup>1</sup>Institute for Drug Research, School of Pharmacy, The Hebrew University of Jerusalem, Hadassah Ein-Kerem, Jerusalem 91120, Israel; [manojkumar.gupta@mail.huji.ac.il](mailto:manojkumar.gupta@mail.huji.ac.il) (M. K. G.)

\*Correspondence: [eylony@ekmd.huji.ac.il](mailto:eylony@ekmd.huji.ac.il) (E.Y.)

| <b>Table of Contents</b>                                            | <b>Page No.</b> |
|---------------------------------------------------------------------|-----------------|
| <b>Materials and methods</b>                                        | <b>S2-S3</b>    |
| <b>HPLC chromatograms for FIT PNAs 2-6</b>                          | <b>S4-S8</b>    |
| <b>Maldi-TOF MS for FIT PNAs 2-6</b>                                | <b>S9-S11</b>   |
| <b>Melting profiles for FIT PNAs 2-6 with RNA</b>                   | <b>S12</b>      |
| <b>UV-Visible dilution assay for RNA duplexes with FIT-PNAs 1-6</b> | <b>S13-S14</b>  |
| <b>Fluorescence emission of RNA duplexes with FIT-PNAs 1-6</b>      | <b>S15</b>      |
| <b>FACS data of FIT-PNAs 1-6 uptake in OVCA433 cells</b>            | <b>S16</b>      |

## Material and Methods

All RNA oligomers were obtained from Integrated DNA Technologies (IDT, Coralville, IA, USA). Fmoc/Bhoc-protected PNA monomers were sourced from PolyOrg Inc. (Leominster, MA, USA), while  $\gamma$ -L-serine PNA monomers ( $A^{\text{Boc}}/C^{\text{Boc}}/G^{\text{Boc}}$  and T) were obtained by Dr. N. S. (Hyderabad, India). The synthesis of the BisQ monomer and FIT-PNA **1** was carried out as previously reported.<sup>1</sup> Solid-phase synthesis was conducted in 5 mL polyethylene syringe reactors (Phenomenex, Torrance, CA, USA) fitted with fritted disks, utilizing NovaSyn TGA resin (90  $\mu\text{m}$ ; Sigma-Aldrich). Fmoc-protected amino acids and O-(7-azabenzotriazol-1-yl)-N,N,N',N'-tetramethyluronium hexafluorophosphate (HATU) were purchased from Chem-Impex, Illinois, USA. Reagents for solid-phase synthesis: 1-hydroxybenzotriazole (HOBt), Dichloromethane (DCM), Dimethylformamide (DMF), N, N-diisopropylethylamine (DIPEA), Trifluoroacetic acid (TFA), diethyl ether, and Acetonitrile were obtained from Bio-Lab LTD, Jerusalem, Israel. Diisopropylcarbodiimide (DIC), 4-Dimethylaminopyridine (DMAP), Pyridine (Py), Piperidine, Acetic anhydride ( $\text{Ac}_2\text{O}$ ), meta-Cresol, 1xPBS buffer salt, and Sinapinic acid were purchased from Merck (USA).

**Solid Phase PNA Synthesis (SPPS):** All FIT-PNA oligomers were manually synthesized on NovaSyn TGA resin (90  $\mu\text{m}$ , 0.25 mmol/g; Sigma-Aldrich). Following resin swelling, the first coupling was for Fmoc-D-Lys(tBOC)OH (Fluka) using a coupling solution of diisopropylcarbodiimide (DIC, 5 equivalents), 4-dimethylaminopyridine (DMAP, 0.1 equivalents), and anhydrous DMF. The reaction mixture was stirred for 6–7 hours, after which unreacted amine sites were capped with acetic-anhydride (Sigma-Aldrich). Fmoc was deprotected with 20% piperidine/DMF, and the resin was rinsed three times with DMF and DCM. The qualitative Kaiser test revealed successful deprotection. Subsequent couplings of Fmoc-D-Lys(tBOC)OH and  $\gamma$ -L-serine PNA monomers ( $T/A^{\text{Boc}}/C^{\text{Boc}}/G^{\text{Boc}}$ ) were carried out using coupling solution of HATU (4 equivalents), HOBt (4 equivalents), and DIEA (4 equivalents) in anhydrous DMF. Each coupling step was carried out with shaking for 1 hour, and the cycle was repeated for each monomer until the desired oligomer length was achieved.

Upon completion, the FIT-PNA oligomers were detached from the solid support utilizing a cleavage solution of m-cresol/trifluoroacetic acid (1:9, v/v) with agitation for 2 hours. The filtrate

was collected, and the product was precipitated using cold diethyl ether. The FIT-PNA oligomers were purified by high-performance liquid chromatography (HPLC) and characterized by matrix-assisted laser desorption/ionization time-of-flight (MALDI-TOF) mass spectrometry.

**Purification and Characterization:** FIT-PNA oligomers were purified by using a Dionex UltiMate 3000 HPLC system (ThermoFisher Scientific, Waltham, MA, USA) using a semi-preparative C18 reversed-phase column (Jupiter C18, 5  $\mu$ m, 300 Å, 250  $\times$  10 mm, Phenomenex, Torrance, USA). Elution was carried out by using eluent A (0.1% TFA in water) and B (Acetonitrile) in a linear gradient between 5-30% acetonitrile in water, over 30 minutes, at a flow rate of 4 mL/min, monitoring absorptions at 260 nm and 590 nm. The purified peak of each FIT-PNA oligomer (Fig. S1-S10) was characterized by MALDI-TOF mass spectrometry (Brucker, USA) using sinapinic acid as matrix, prepared in acetonitrile/water (70:30 ratio) solution containing 0.1% TFA (Fig. S11-S15).

**Table S1.** RNA Sequences used for studies

| <b>ID</b> | <b>RNA and mismatches RNA sequences (5' – 3')</b> |
|-----------|---------------------------------------------------|
| RNA       | UAUGUA U GUUG                                     |
| RNA-TG    | UAUGUG U GUUG                                     |
| RNA-TC    | UAUGUC U GUUG                                     |
| RNA-TU    | UAUGUU U GUUG                                     |

bold letters – mismatches in RNA sequence

## HPLC Chromatograms of FIT-PNAs

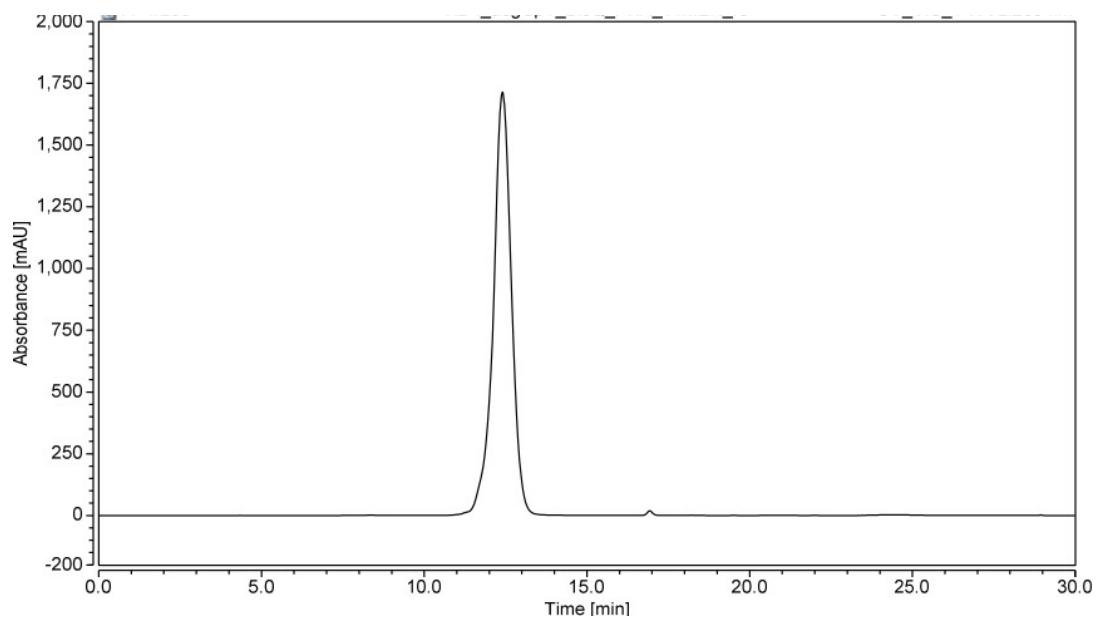

**Fig. S1.** HPLC chromatogram of FIT-PNA 2 at 260 nm. Eluents: A (0.1% TFA in water) and B (ACN) were used in a linear gradient (5-30% B in 20 min) with a flow rate of 4 mL/min.

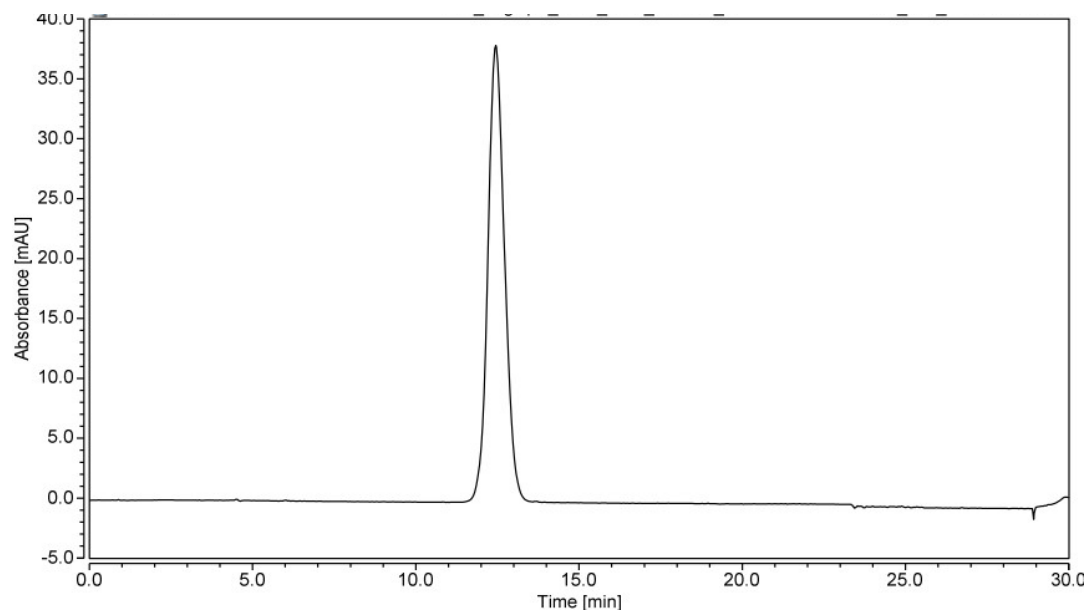

**Fig. S2.** HPLC chromatogram of FIT-PNA 2 at 590 nm. Eluents: A (0.1% TFA in water) and B (ACN) were used in a linear gradient (5-30% B in 20 min) with a flow rate of 4 mL/min.

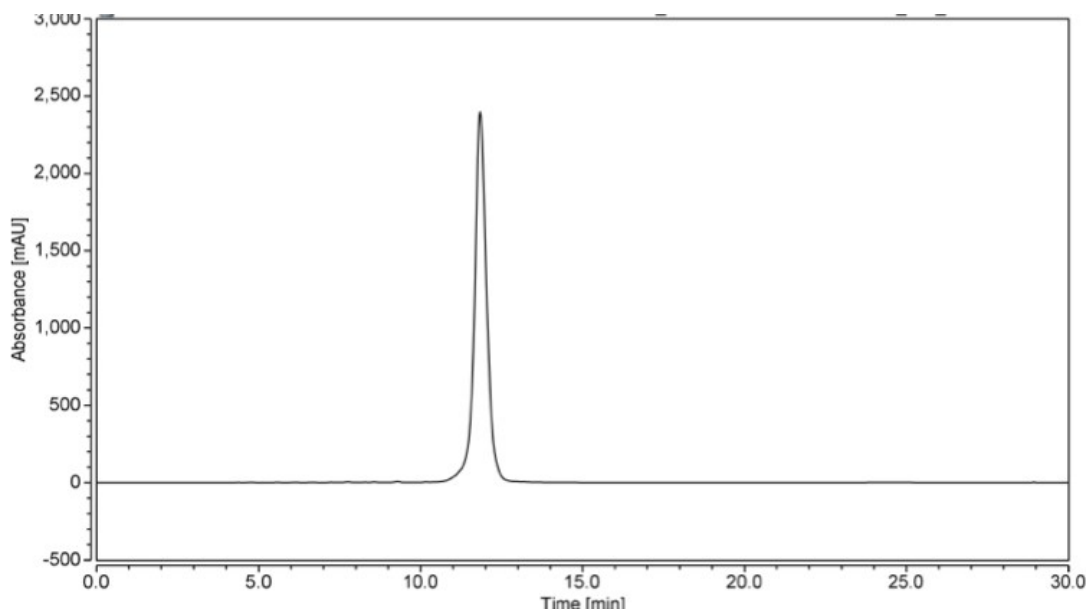

**Fig. S3.** HPLC chromatogram of FIT-PNA 3 at 260 nm. Eluents: A (0.1% TFA in water) and B (ACN) were used in a linear gradient (5-30% B in 20 min) with a flow rate of 4 mL/min.

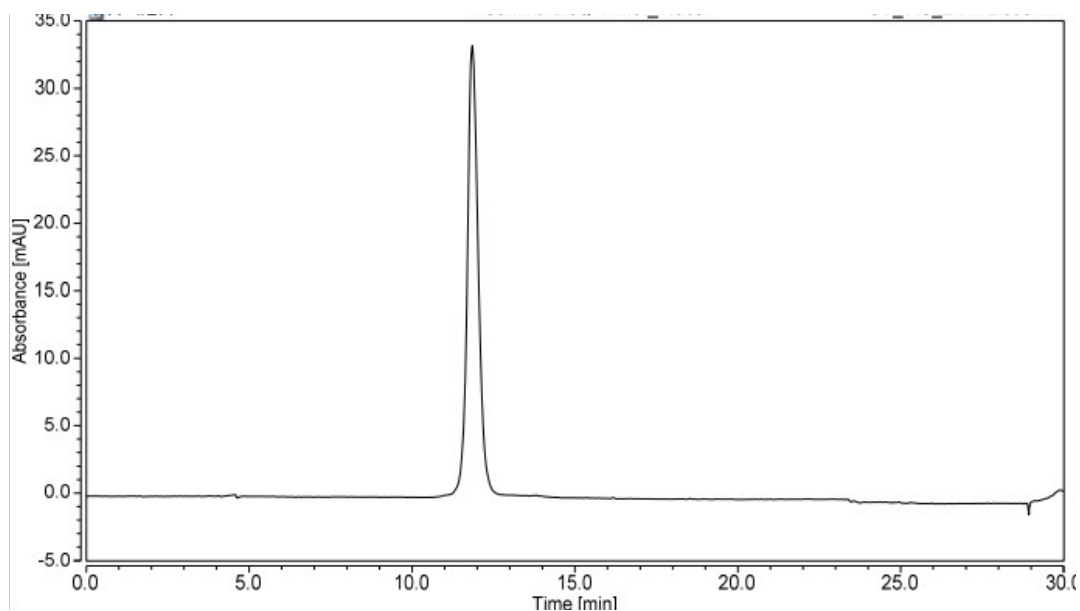

**Fig. S4.** HPLC chromatogram of FIT-PNA 3 at 590 nm. Eluents: A (0.1% TFA in water) and B (ACN) were used in a linear gradient (5-30% B in 20 min) with a flow rate of 4 mL/min.

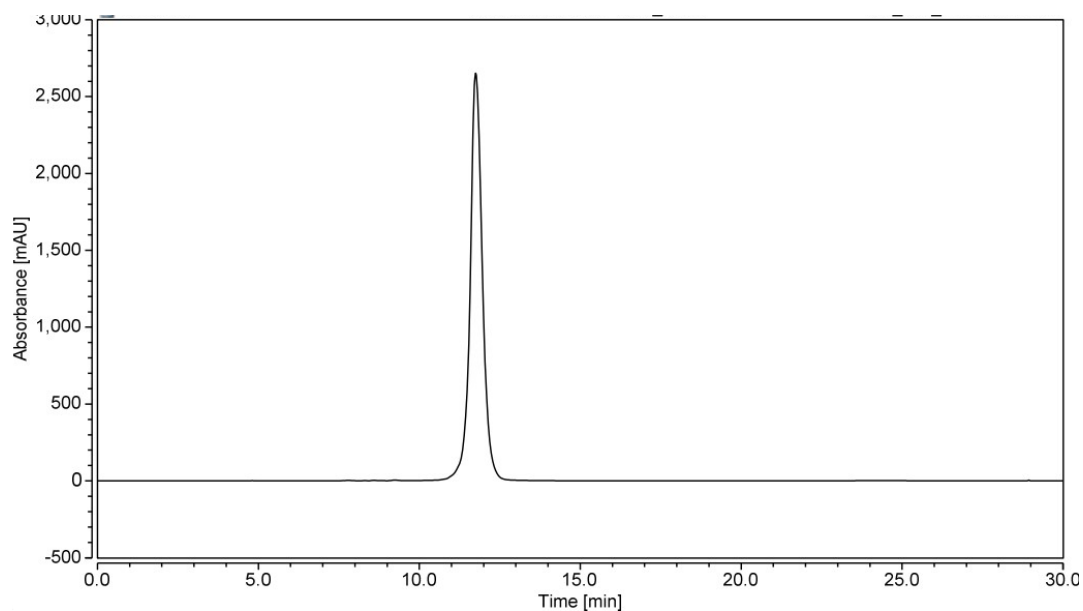

**Fig. S5.** HPLC chromatogram of FIT-PNA 4 at 260 nm. Eluents: A (0.1% TFA in water) and B (ACN) were used in a linear gradient (5-30% B in 20 min) with a flow rate of 4 mL/min.

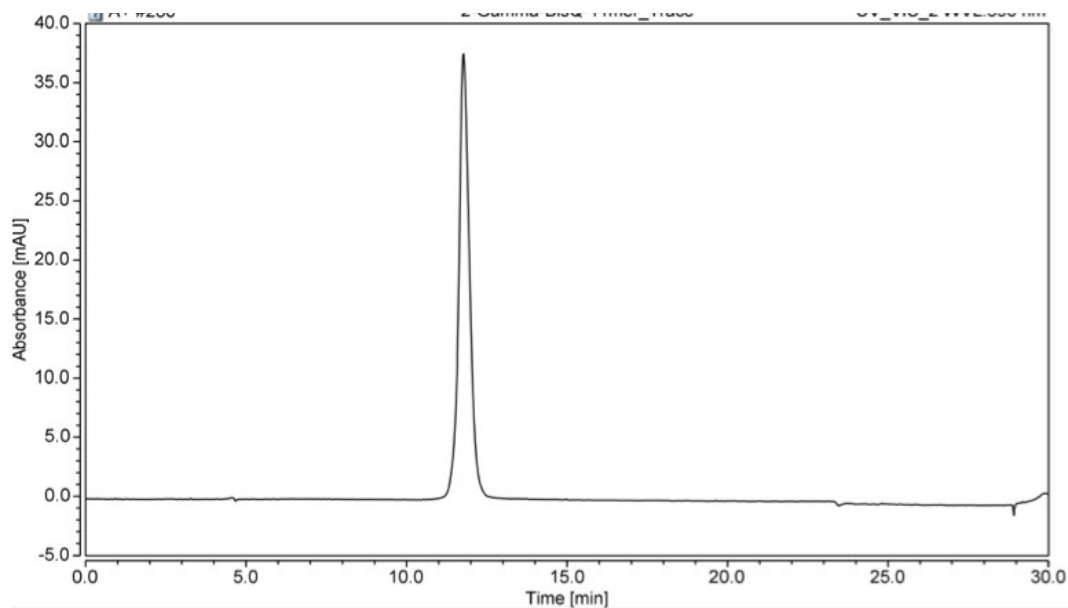

**Fig. S6.** HPLC chromatogram of FIT-PNA 4 at 590 nm. Eluents: A (0.1% TFA in water) and B (ACN) were used in a linear gradient (5-30% B in 20 min) with a flow rate of 4 mL/min.

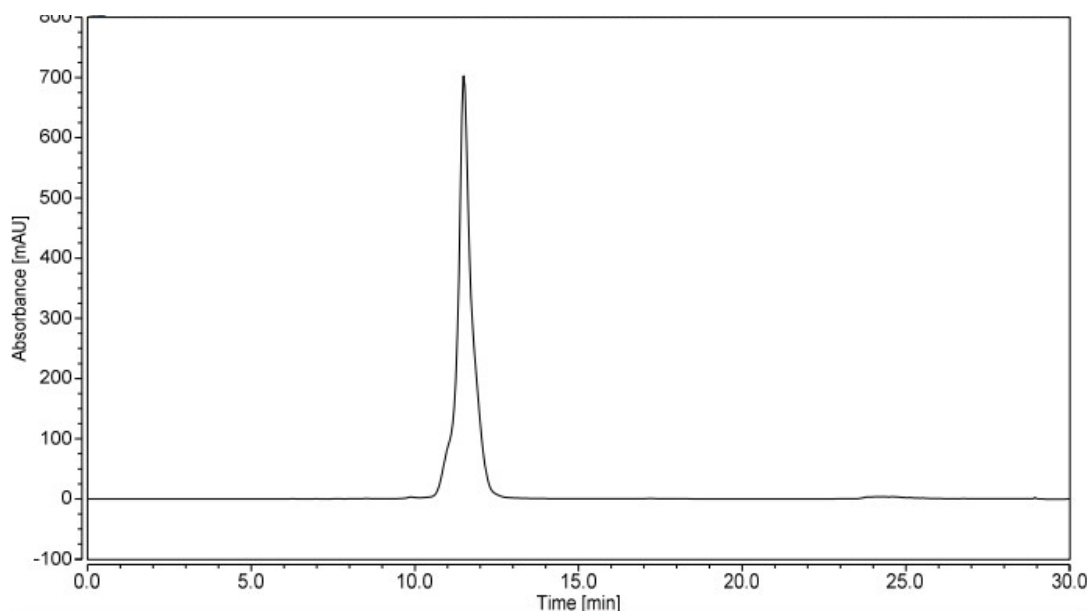

**Fig. S7.** HPLC chromatogram of FIT-PNA 5 at 260 nm. Eluents: A (0.1% TFA in water) and B (ACN) were used in a linear gradient (5-30% B in 20 min) with a flow rate of 4 mL/min.

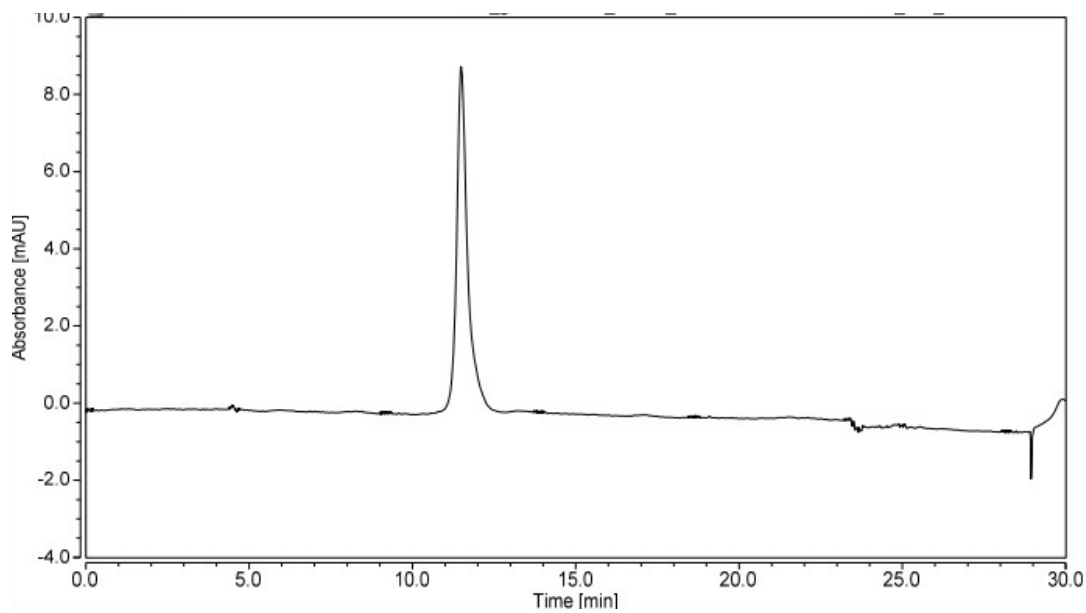

**Fig. S8.** HPLC chromatogram of FIT-PNA 5 at 590 nm. Eluents: A (0.1% TFA in water) and B (ACN) were used in a linear gradient (5-30% B in 20 min) with a flow rate of 4 mL/min.

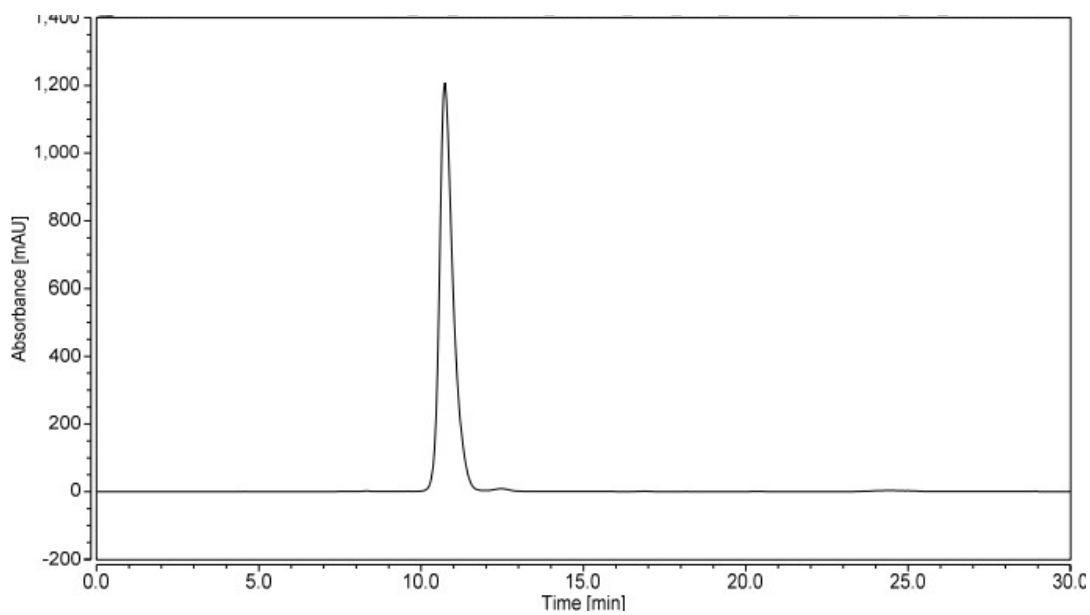

**Fig. S9.** HPLC chromatogram of FIT-PNA 6 at 260 nm. Eluents: A (0.1% TFA in water) and B (ACN) were used in a linear gradient (5-30% B in 20 min) with a flow rate of 4 mL/min.

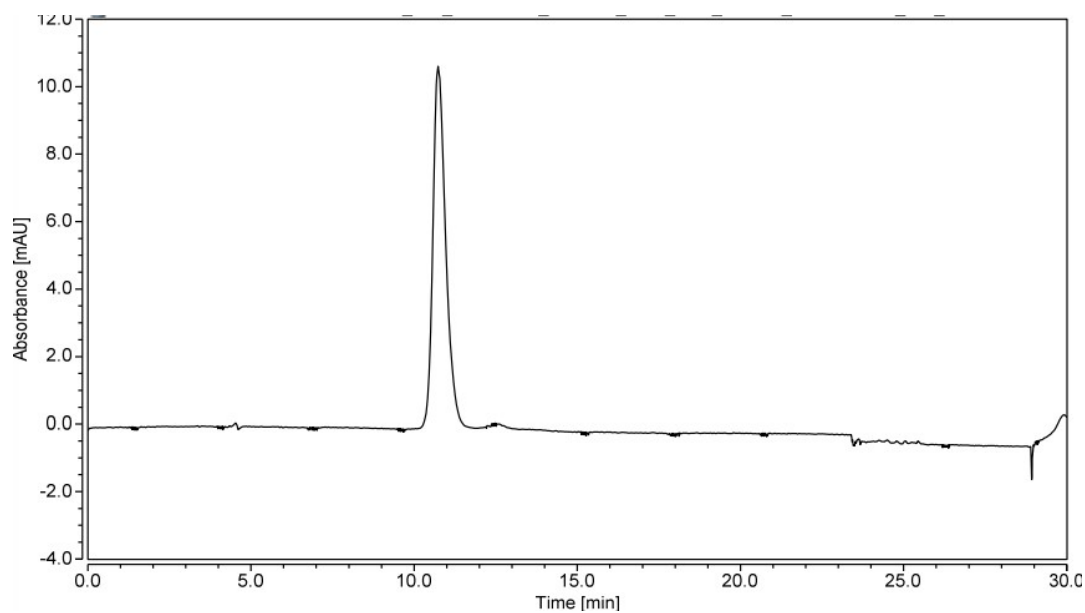

**Fig. S10.** HPLC chromatogram of FIT-PNA 6 at 590 nm. Eluents: A (0.1% TFA in water) and B (ACN) were used in a linear gradient (5-30% B in 20 min) with a flow rate of 4 mL/min.



## Maldi-TOF MS for FIT-PNAs

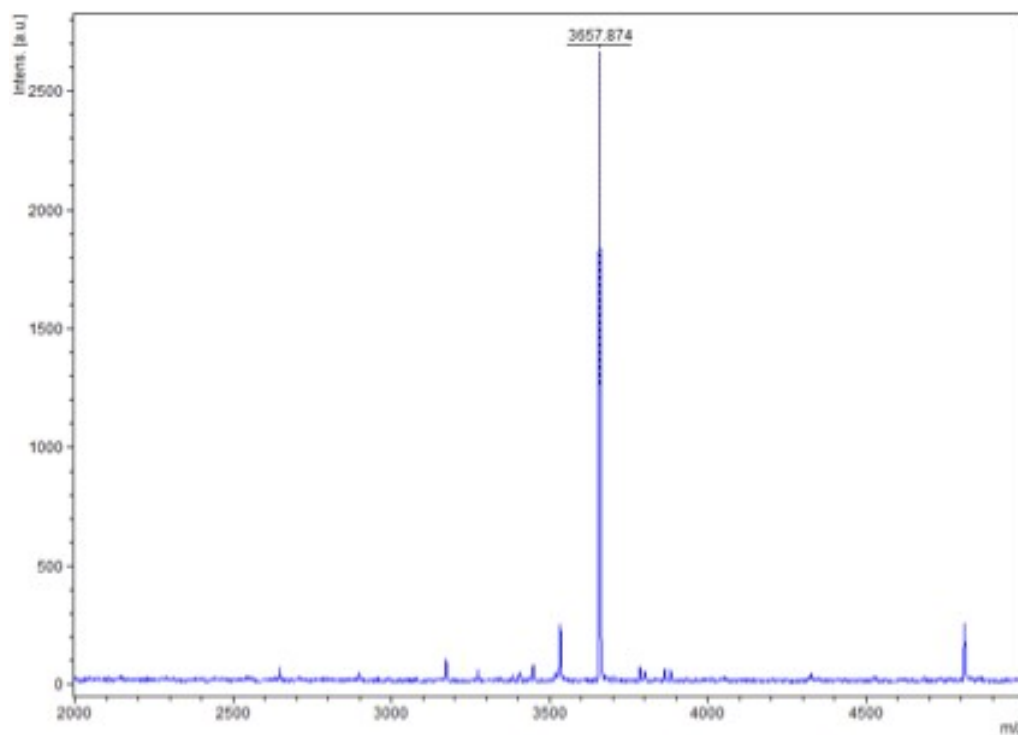

**Fig. S11.** Maldi-TOF MS for FIT-PNA 2. Calculated mass: 3657.7  $[M]^+$ . Observed Mass: 3667.9

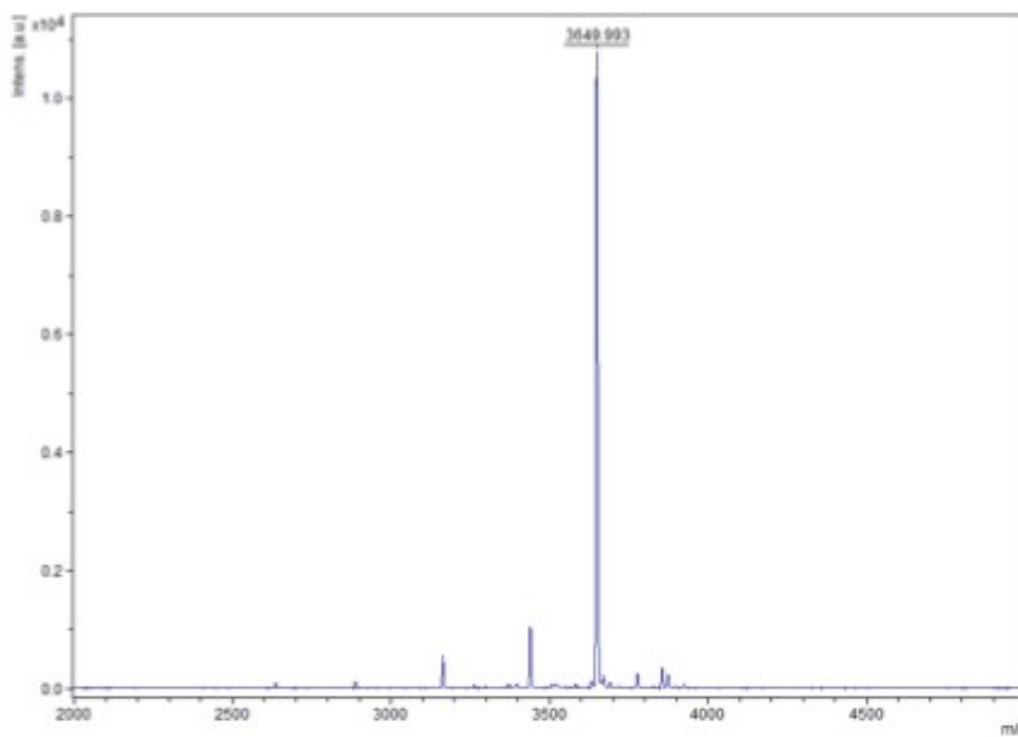

**Fig. S12.** Maldi-TOF MS for FIT-PNA 3. Calculated mass: 3649.8  $[M+H]^+$ . Observed Mass: 3650.0

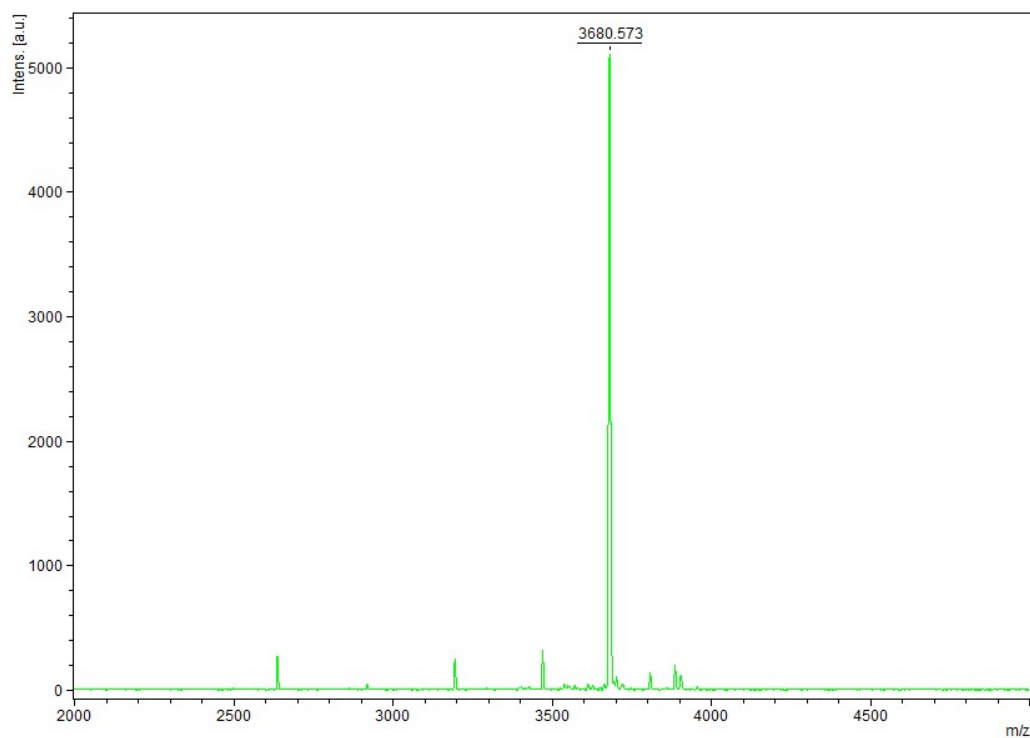

**Fig. S13.** Maldi-TOF MS for FIT-PNA 4. Calculated mass: 3679.8  $[M+H]^+$ . Observed Mass: 3680.6.

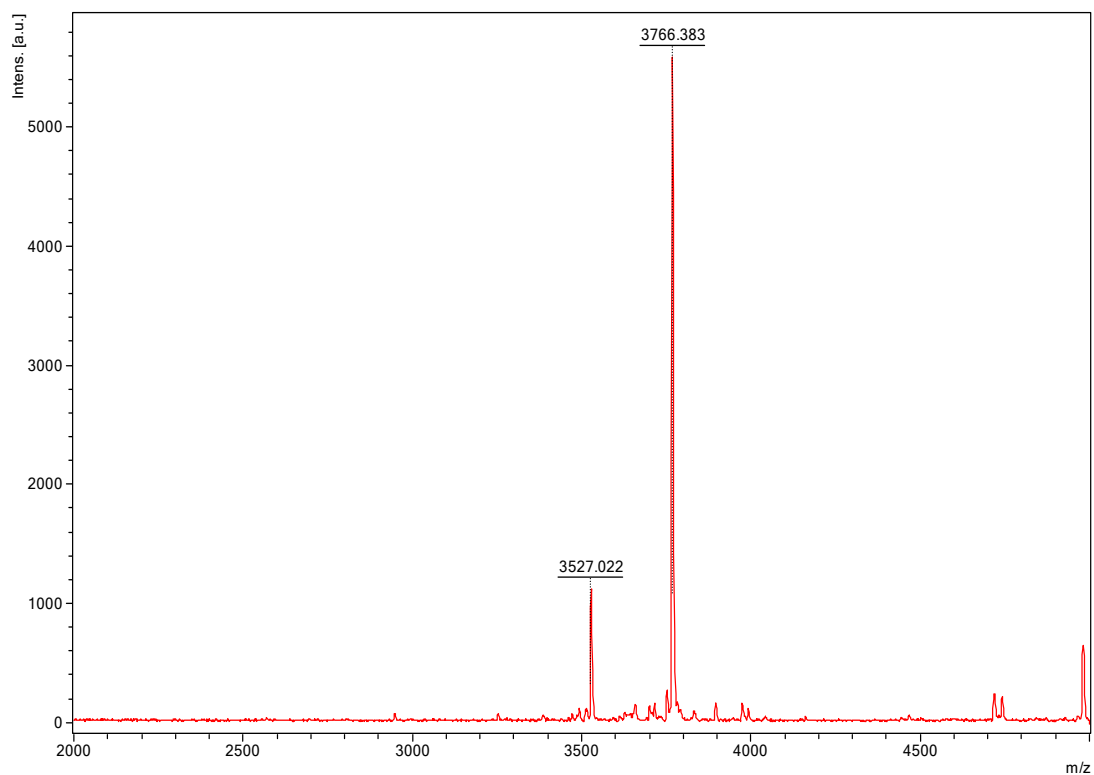

**Fig. S14.** Maldi-TOF MS for FIT-PNA 5. Calculated mass: 3768.9  $[M]^+$ . Observed Mass: 3766.4.

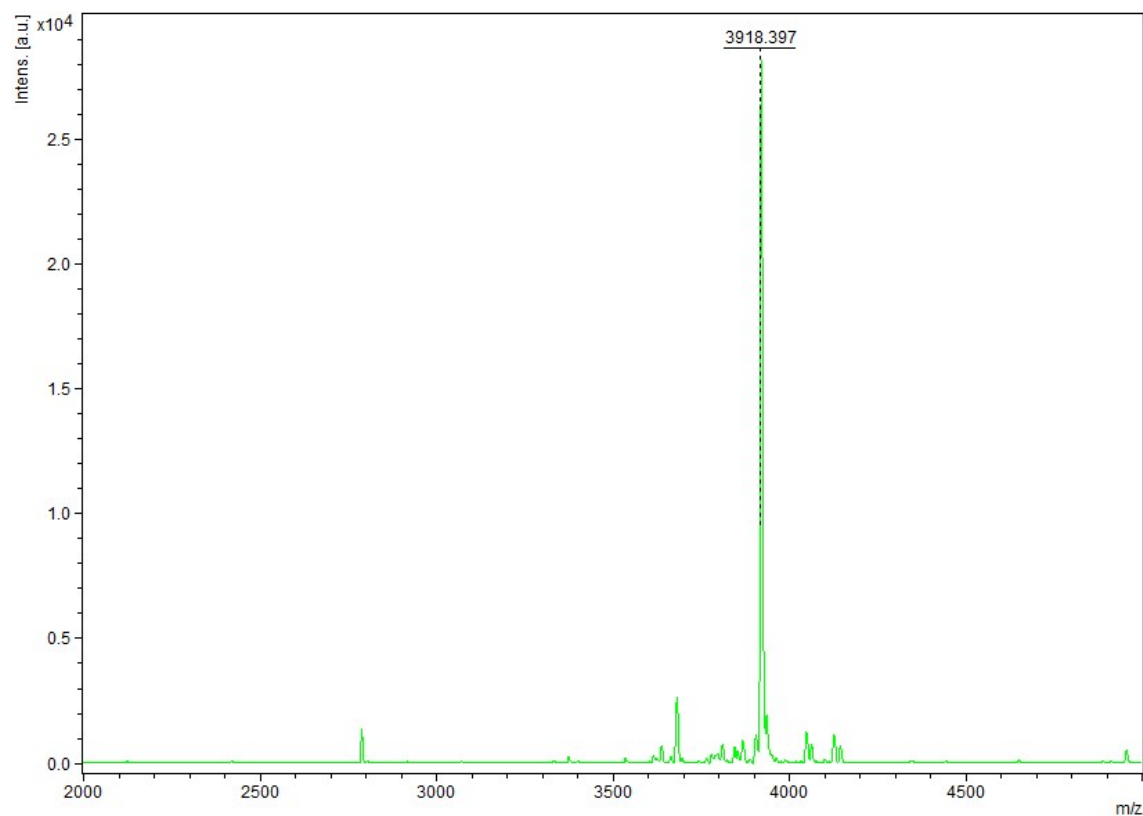

**Fig. S15.** Maldi-TOF MS for FIT-PNA 6. Calculated mass: 3919.0 [M]<sup>+</sup>. Observed Mass: 3918.4.

**Table S2.** Melting Temperatures of RNA:FIT-PNA Duplexes Measured at 260 nm

| S.No. | RNA with complementary                   | $T_m$ (°C) |       |       | Average<br>$T_m$ (°C) | Std.<br>Dev. |
|-------|------------------------------------------|------------|-------|-------|-----------------------|--------------|
|       |                                          | 1st        | 2nd   | 3rd   |                       |              |
| 1     | aeg-BisQ-PNA                             | 42.52      | 43.89 | 42.49 | 43.0                  | 0.6          |
| 2     | aeg-cpT-BisQ-PNA                         | 43.72      | 46.08 | 45.77 | 45.2                  | 1.0          |
| 3     | ( $\gamma$ -ser) <sub>1</sub> -BisQ-PNA  | 44.39      | 43.42 | 44.34 | 44.0                  | 0.4          |
| 4     | ( $\gamma$ -ser) <sub>2</sub> -BisQ-PNA  | 46.70      | 45.96 | 44.47 | 45.7                  | 0.9          |
| 5     | ( $\gamma$ -ser) <sub>5</sub> -BisQ-PNA  | 44.27      | 44.75 | 44.92 | 44.6                  | 0.3          |
| 6     | ( $\gamma$ -ser) <sub>10</sub> -BisQ-PNA | 51.41      | 51.07 | 50.44 | 51.0                  | 0.4          |

## Thermal Melting Profiles for RNA:FIT-PNA Duplexes

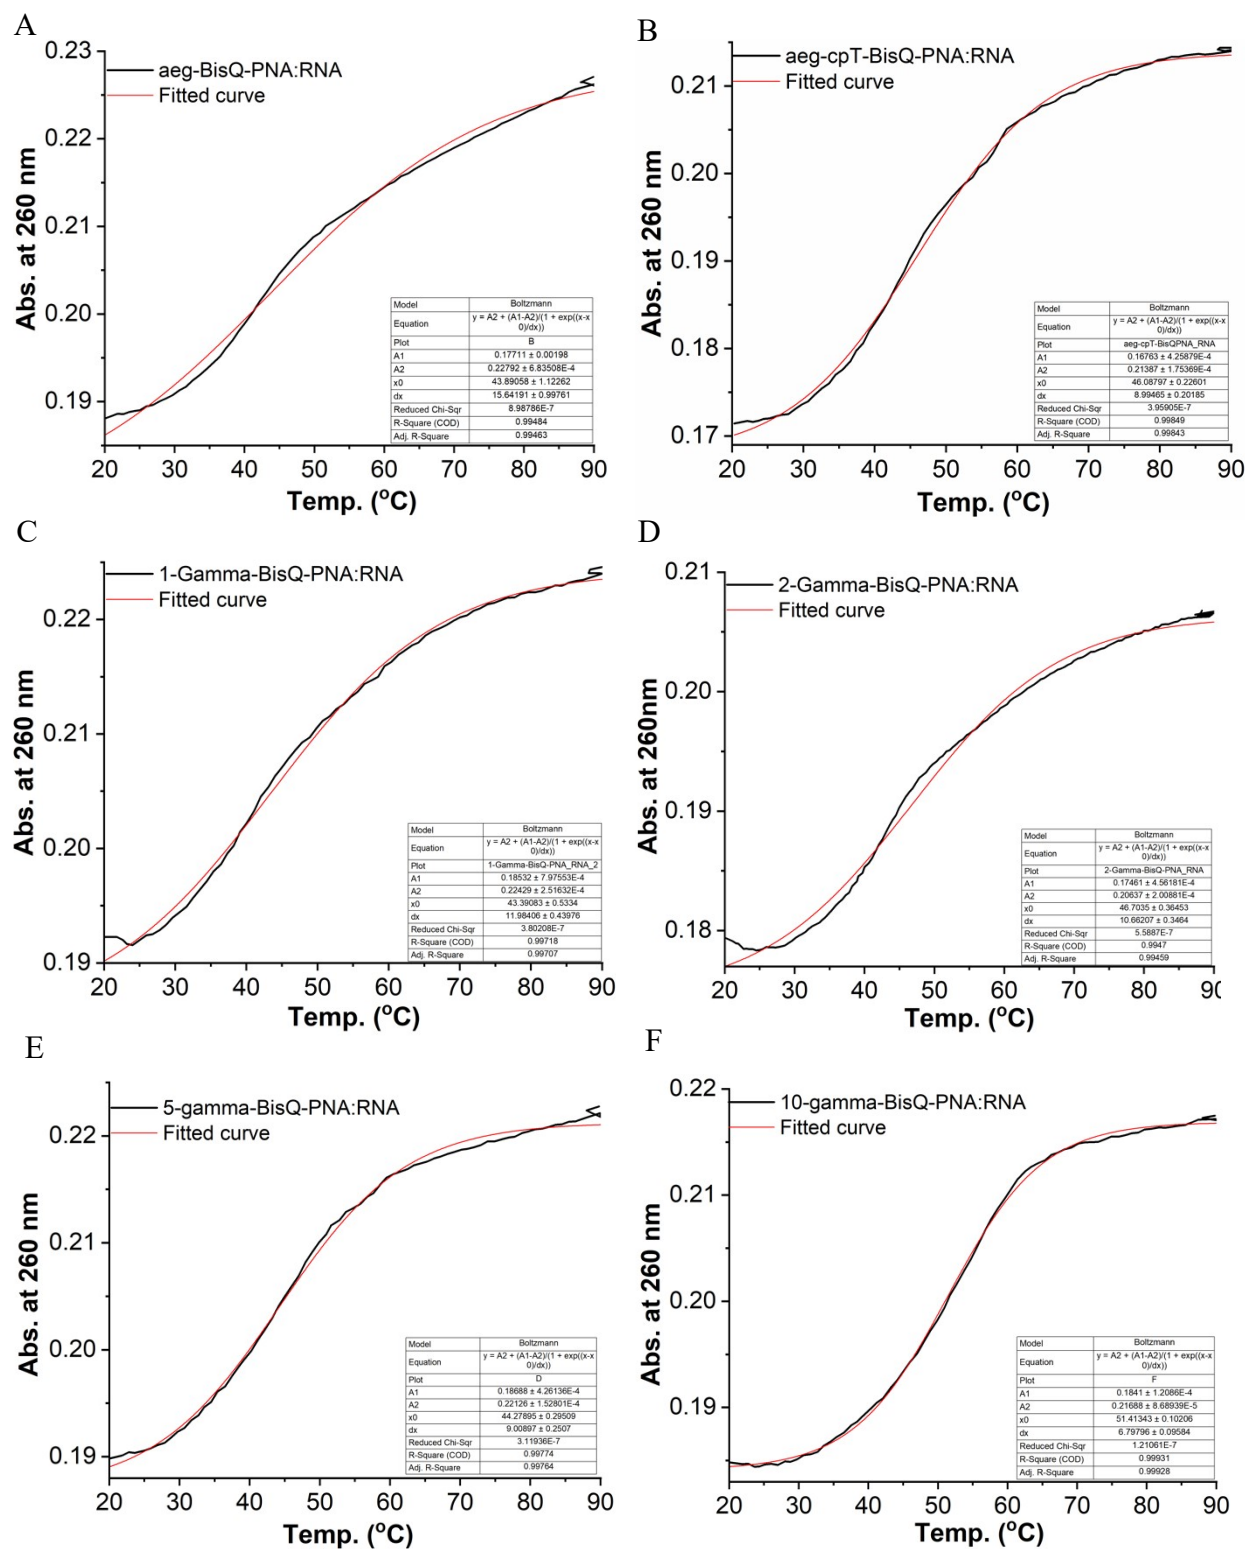

**Fig. S16.** Representative melting curve profiles for RNA:FIT-PNA duplexes (1 - 6). [FIT-PNA] = 1  $\mu$ M, [RNA] = 1  $\mu$ M.

## UV-Visible Titrations for FIT-PNA:RNA Duplexes

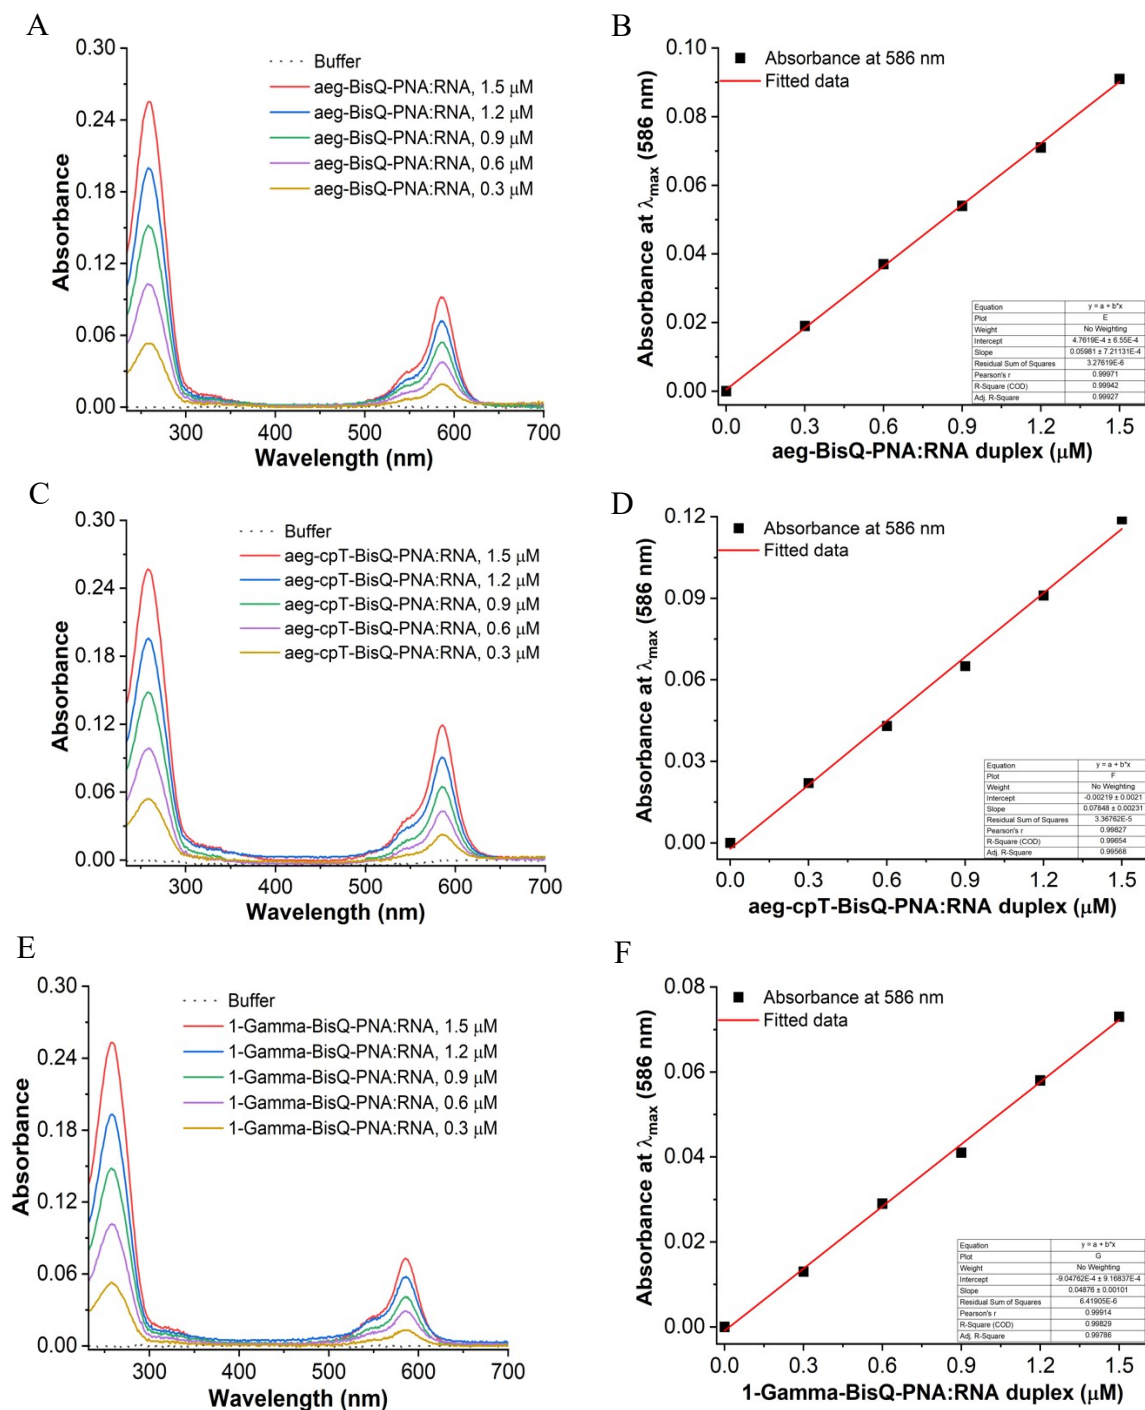

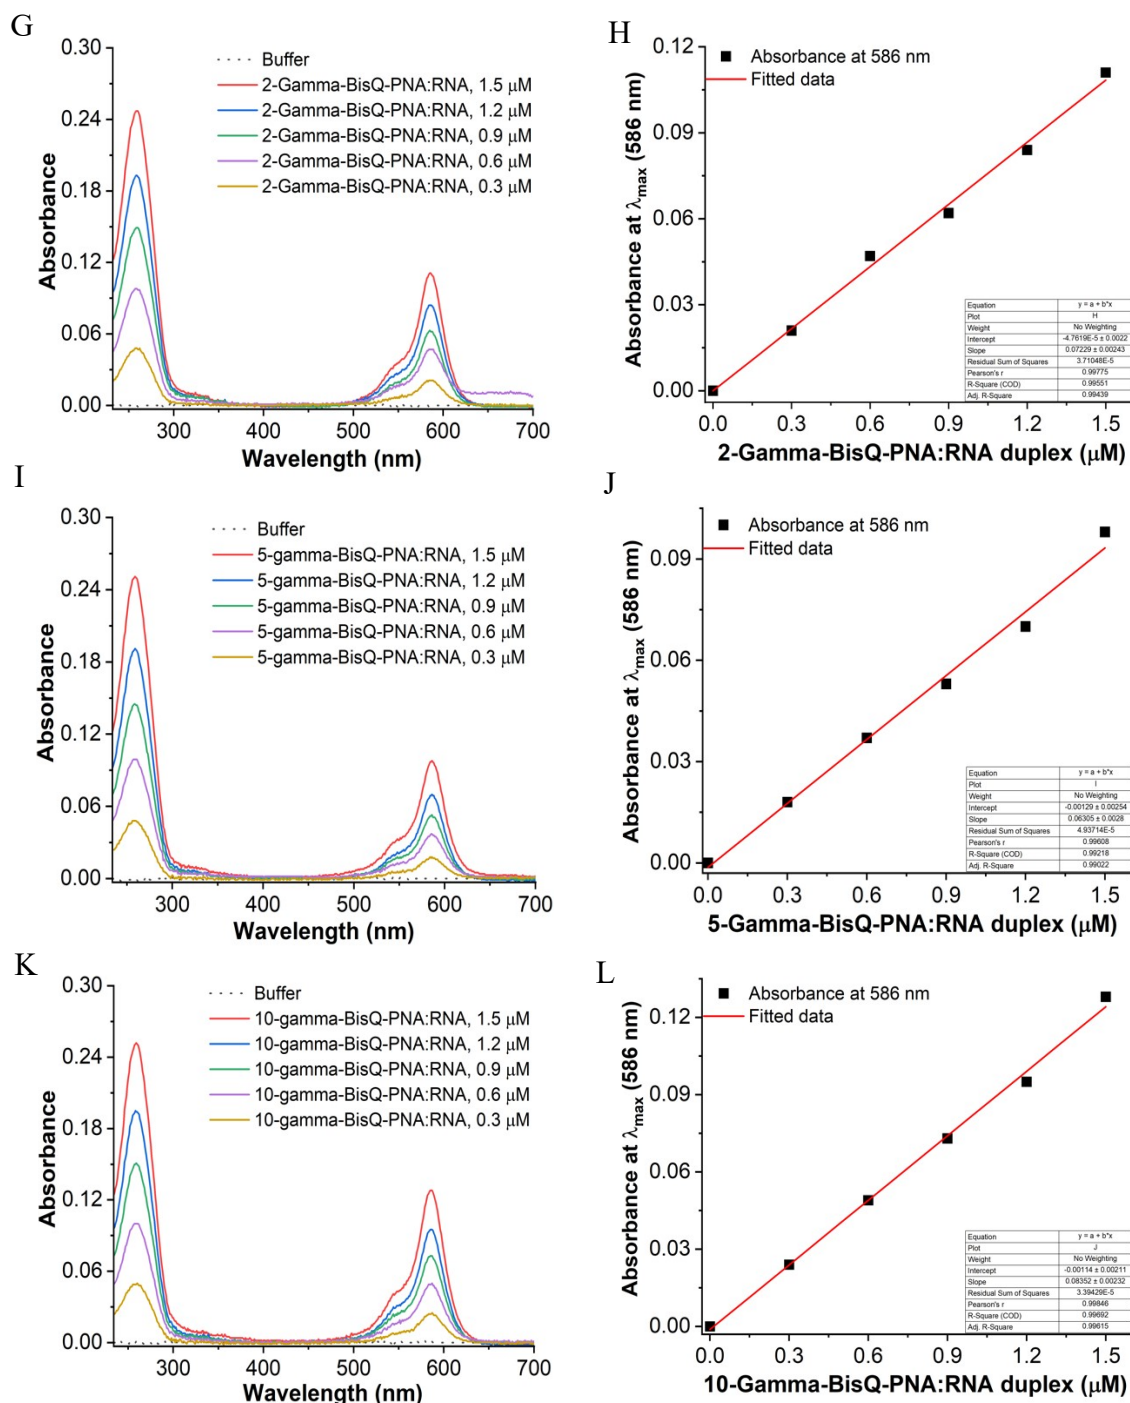

**Fig. S17.** UV-Vis titrations for complementary RNA annealed to FIT-PNAs (1–6). [FIT-PNA] = 1.5  $\mu\text{M}$  and [RNA] = 1.5  $\mu\text{M}$  in 1xPBS (pH 7.0). UV-Vis spectra of the respective duplexes are given in panels A, C, E, G, I, and K, and the corresponding linear plots at the absorbance maximum ( $\lambda_{\text{max}} = 586 \text{ nm}$ ) are shown in panels B, D, F, H, J, and L.

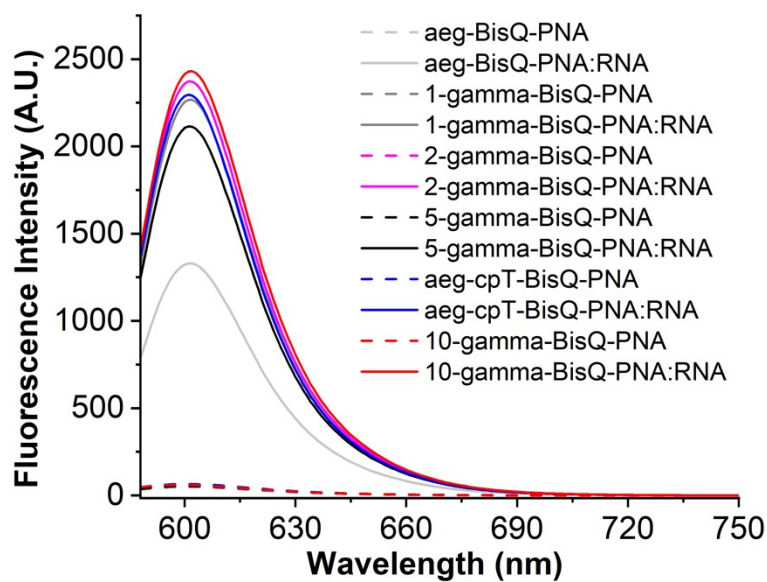

**Fig. S18.** Fluorescence emission of FIT-PNA:RNA duplexes (1-6).  $[FIT-PNA] = 3\mu M$ ,  $[RNA] = 4.5\mu M$ , in 1xPBS buffer, pH=7.  $\lambda_{ex} = 580$  nm and  $\lambda_{em} = 588$  nm ( $n = 3$ ).



## FACS results of FIT-PNAs in OVCA433

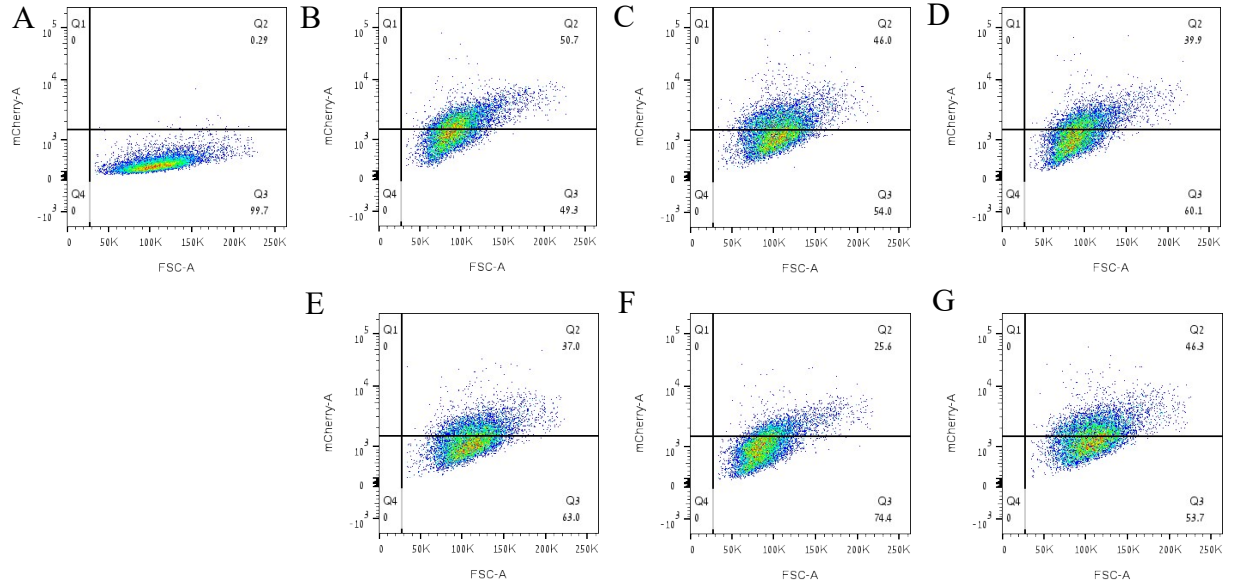

**Fig. S19.** FACS results for FIT-PNAs (1-6) in OVCA433 cells. OVCA433 cells were incubated in cell culture media with 5  $\mu$ M of FIT-PNAs for 5h, washed 3x with 1xPBS, trypsinized and collected in 1xPBS. (A) untreated OVCA433 cells (as control) (B) aeg-BisQ-PNA (C) aeg-cpT-BisQ-PNA (D) ( $\gamma$ -Ser)<sub>1</sub>-BisQ-PNA (E) ( $\gamma$ -Ser)<sub>2</sub>-BisQ-PNA (F) ( $\gamma$ -Ser)<sub>5</sub>-BisQ-PNA, and (G) ( $\gamma$ -Ser)<sub>10</sub>-BisQ-PNA

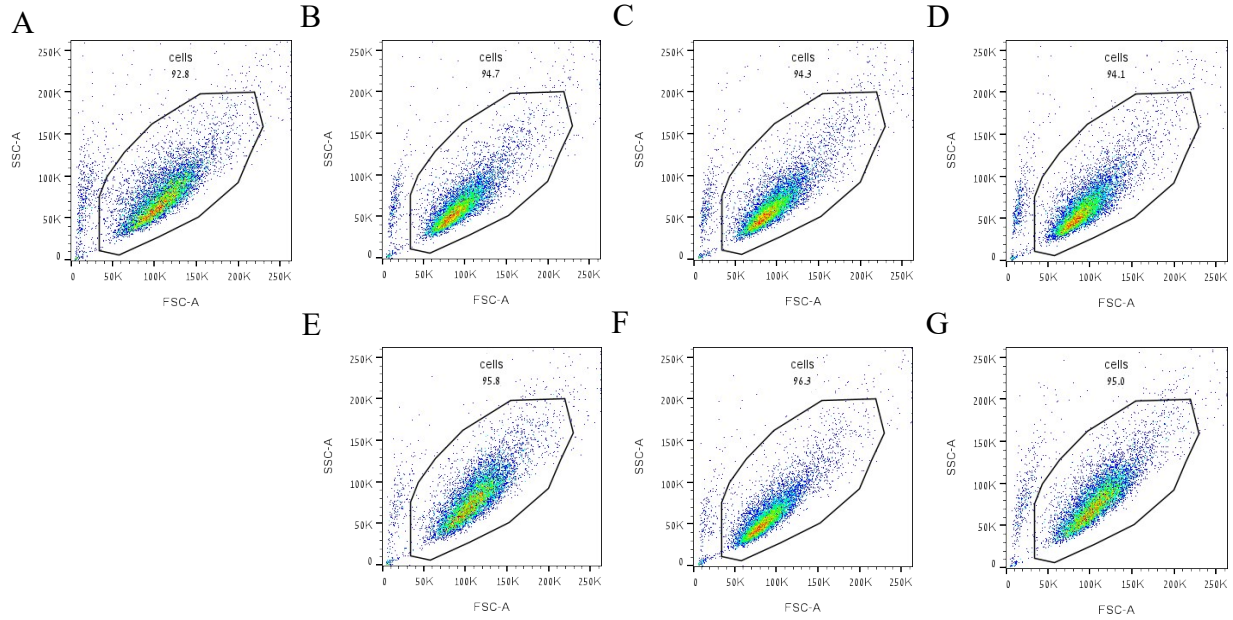

**Fig. S20.** Forward and sideward scattered plots of all FIT-PNAs in the OVCA433 cells. (A) untreated OVCA433 cells (as control) (B) aeg-BisQ-PNA (C) aeg-cpT-BisQ-PNA (D) ( $\gamma$ -Ser)<sub>1</sub>-BisQ-PNA (E) ( $\gamma$ -Ser)<sub>2</sub>-BisQ-PNA (F) ( $\gamma$ -Ser)<sub>5</sub>-BisQ-PNA, and (G) ( $\gamma$ -Ser)<sub>10</sub>-BisQ-PNA



Reference:

1. O. Tepper, H. C. Zheng, D. H. Appella and E. Yavin, *Chem. Commun.*, 2021, **57**, 540-543. Erratum: 2023, **59**, 11593.
